# Supplementary material
Source: PubMed Central journal article supplement (PMC4335992)
Supplement: supp_WNL.0000000000001155_e-tables.pdf [file supp_WNL.0000000000001155_e-tables.pdf]

**Table e-1: Injurious falls - resulting in visit to medical practitioner, emergency department visit or hospital admission**

| <b>Injuries</b>                                       |                                                                                                                                                                          |                                                                                                                                   |
|-------------------------------------------------------|--------------------------------------------------------------------------------------------------------------------------------------------------------------------------|-----------------------------------------------------------------------------------------------------------------------------------|
|                                                       | <b>Exercise group</b>                                                                                                                                                    | <b>Control group</b>                                                                                                              |
| <b>Visit to medical practitioner following a fall</b> | N = 11:<br>4 x bruises <sup>#</sup><br>4 x lacerations <sup>##</sup><br>2 x sprains<br>1 x rib fracture                                                                  | N=10:<br>5 x sprains<br>2 x lacerations<br>1 x dislocated thumb<br>1 x fracture foot (hairline)<br>1 x not specified              |
| <b>Emergency department visit following a fall</b>    | N= 4:<br>2 x sutures to head <sup>#</sup><br>1 x bruised hip<br>1 x unknown                                                                                              | N= 5:<br>3 x sutures to head<br>1 x wrist fracture*<br>1 x ankle sprain                                                           |
| <b>Hospital admission</b>                             | N= 6:<br>1 x lost eye <sup>##</sup><br>1 x fracture femur, L3 and L4<br>1 x sutures to head<br>1 x wrist fracture<br>1 x intercostal bruising<br>1 x unknown (pneumonia) | N= 4:<br>1 x fracture neck of femur<br>1 x dislocated shoulder +<br>sutures to head<br>1 x wrist fracture<br>1 x sutures to head* |

\*One control group participant attended the emergency department following one fall, and was admitted to hospital following another fall. <sup>#</sup>One exercise group participant visited a medical practitioner following one fall, and attended the emergency department following another fall. <sup>##</sup>One exercise group participant visited a medical practitioner following one fall, and was admitted to hospital following another fall.

**Table e-2:** Subgroup analyses (based on fall history, physical function, disease severity and cognition) of primary outcomes.

| Subgroup                                                             | P-value for interaction term |                       |
|----------------------------------------------------------------------|------------------------------|-----------------------|
|                                                                      | Number of falls              | Proportion of fallers |
| <b>Fall history</b>                                                  |                              |                       |
| Dichotomous ( $\leq 9$ falls in past year)                           | 0.62                         | 0.99                  |
| <b>Physical function</b>                                             |                              |                       |
| 4m comfortable walk speed (continuous)                               | 0.28                         | 0.50                  |
| 4m comfortable walk speed (dichotomous $\leq 0.97 \text{ ms}^{-1}$ ) | 0.96                         | 0.57                  |
| <b>Disease severity</b>                                              |                              |                       |
| UPDRS motor score (continuous)                                       | 0.02*                        | 0.03*                 |
| UPDRS motor score (dichotomous $\leq 26$ )                           | $<0.001^{***}$               | 0.001**               |
| <b>Cognition</b>                                                     |                              |                       |
| Frontal Assessment Battery score<br>(continuous)                     | 0.048*                       | 0.16                  |
| Frontal Assessment Battery score<br>(dichotomous $\leq 13$ )         | 0.45                         | 0.39                  |

*P-values for interaction between intervention and the subgroup variable are shown.*

UPDRS: Unified Parkinson's Disease Rating Scale

\* $p < 0.05$ , \*\* $p < 0.01$ , \*\*\* $p < 0.001$

**Table e-3.** Mean (SD) score, mean (SD) difference within groups, and mean (95%CI) difference between groups for secondary outcomes for the experimental group and the control group.

| Outcome                                                    | Score          |                |                |                | Difference within groups |                 | Difference between groups            |
|------------------------------------------------------------|----------------|----------------|----------------|----------------|--------------------------|-----------------|--------------------------------------|
|                                                            | Week 0         |                | Week 26        |                | Week 26 minus Week 0     |                 | Week 26 adjusted for Week 0†         |
|                                                            | Exp            | Con            | Exp            | Con            | Exp                      | Con             | Exp minus Con                        |
|                                                            | N=115          | N=116          | N=104          | N=115          |                          |                 | <i>p-value</i>                       |
| PD Fall Risk score <sup>a,b</sup> (0-1)                    | 0.40<br>(0.28) | 0.40<br>(0.30) | 0.38<br>(0.28) | 0.42<br>(0.30) | 0.00<br>(0.19)           | 0.03<br>(0.20)  | -0.03 (-0.08 to 0.02)<br><i>0.26</i> |
| Mean knee extensor strength of both legs (kg) <sup>c</sup> | 28.9<br>(9.7)  | 30.0<br>(10.7) | 30.1<br>(9.4)  | 29.9<br>(10.2) | 1.1<br>(6.4)             | -0.2<br>(5.7)   | 1.0 (-0.5 to 2.5)<br><i>0.20</i>     |
| Coordinated stability test (error score) <sup>a,b</sup>    | 16.6<br>(13.0) | 17.3<br>(14.8) | 17.9<br>(15.8) | 18.7<br>(14.6) | 1.7<br>(11.3)            | 1.8<br>(11.3)   | -0.3 (-3.2 to 2.7)<br><i>0.85</i>    |
| SPPB continuous measure (0-3) <sup>c</sup>                 | 2.35<br>(0.41) | 2.44<br>(0.30) | 2.39<br>(0.35) | 2.34<br>(0.42) | 0.04<br>(0.36)           | -0.10<br>(0.34) | 0.10 (0.01 to 0.19)<br><i>0.03*</i>  |

| Outcome                                                  | Score          |                |                |                | Difference within groups |                 | Difference between groups             |
|----------------------------------------------------------|----------------|----------------|----------------|----------------|--------------------------|-----------------|---------------------------------------|
|                                                          | Week 0         |                | Week 26        |                | Week 26 minus Week 0     |                 | Week 26 adjusted for Week 0†          |
|                                                          | Exp            | Con            | Exp            | Con            | Exp                      | Con             | Exp minus Con                         |
|                                                          | N=115          | N=116          | N=104          | N=115          |                          |                 | <i>p-value</i>                        |
| 4 m fast walk speed<br>(m.s <sup>-1</sup> ) <sup>b</sup> | 1.35<br>(0.38) | 1.36<br>(0.37) | 1.36<br>(0.43) | 1.30<br>(0.44) | -0.02<br>(0.23)          | -0.05<br>(0.24) | 0.04 (-0.03 to 0.10)<br><i>0.24</i>   |
| 5 repetition sit-to-stand<br>(stand/s) <sup>c</sup>      | 0.35<br>(0.15) | 0.37<br>(0.17) | 0.38<br>(0.16) | 0.37<br>(0.18) | 0.03<br>(0.13)           | -0.01<br>(0.12) | 0.03 (0.002 to 0.07)<br><i>0.04*</i>  |
| FOG questionnaire<br>(0-24) <sup>a</sup>                 | 7.4<br>(5.1)   | 8.1<br>(5.4)   | 7.7<br>(5.3)   | 9.1<br>(6.1)   | 0.5<br>(3.6)             | 1.1<br>(3.3)    | -0.6 (-1.6 to 0.3)<br><i>0.17</i>     |
| FES-I (16-64) <sup>a</sup>                               | 31.8<br>(9.2)  | 32.2<br>(10.4) | 31.6<br>(9.1)  | 34.9<br>(11.1) | -0.3<br>(7.1)            | 2.9<br>(7.6)    | -3.2 (-5.1 to -1.4)<br><i>0.001**</i> |
| SF-12 physical (0-100)                                   | 42.3<br>(7.6)  | 42.9<br>(7.9)  | 41.3<br>(8.8)  | 40.2<br>(7.8)  | -0.9<br>(8.4)            | -2.7<br>(6.5)   | 1.6 (-0.2 to 3.4)<br><i>0.09</i>      |
| SF-12 mental (0-100)                                     | 51.6<br>(6.5)  | 50.5<br>(6.8)  | 51.2<br>(6.4)  | 50.3<br>(6.7)  | -0.6<br>(6.0)            | -0.3<br>(5.7)   | 0.2 (-1.2 to 1.6)<br><i>0.78</i>      |

| Outcome                         | Score          |                |                |                | Difference within groups |                 | Difference between groups             |
|---------------------------------|----------------|----------------|----------------|----------------|--------------------------|-----------------|---------------------------------------|
|                                 | Week 0         |                | Week 26        |                | Week 26 minus Week 0     |                 | Week 26 adjusted for Week 0†          |
|                                 | Exp            | Con            | Exp            | Con            | Exp                      | Con             | Exp minus Con                         |
|                                 | N=115          | N=116          | N=104          | N=115          |                          |                 | <i>p-value</i>                        |
| SF-6D utility score (0-1)       | 0.64<br>(0.09) | 0.65<br>(0.10) | 0.63<br>(0.10) | 0.61<br>(0.10) | -0.01<br>(0.08)          | -0.04<br>(0.08) | 0.03 (0.01 to 0.05)<br><i>0.006**</i> |
| Exercise (hr/wk)                | 3.6<br>(3.5)   | 4.0<br>(4.1)   | 3.6<br>(4.8)   | 3.2<br>(3.0)   | 0.0<br>(4.4)             | -0.9<br>(3.1)   | 0.7 (-0.2 to 1.6)<br><i>0.15</i>      |
| ADL (hr/day)                    | 2.4<br>(1.3)   | 2.4<br>(1.3)   | 2.4<br>(1.3)   | 2.4<br>(1.3)   | 0.0<br>(1.2)             | 0.0<br>(1.1)    | 0.0 (-0.3 to 0.3)<br><i>1.00</i>      |
| PDQ-39 (0-100) <sup>a</sup>     | 28.0<br>(13.9) | 30.7<br>(15.4) | 29.7<br>(14.8) | 32.5<br>(15.9) | 1.9<br>(9.4)             | 2.1<br>(10.2)   | -0.6 (-3.2 to 1.9)<br><i>0.63</i>     |
| Positive affect scale<br>(0-50) | 31.7<br>(6.7)  | 32.2<br>(7.6)  | 32.6<br>(6.6)  | 31.1<br>(7.5)  | 1.0<br>(6.3)             | -1.0<br>(5.2)   | 1.8 (0.4 to 3.2)<br><i>0.01*</i>      |

†Values adjusted for baseline (Week 0) score based on ANCOVA; \* $p < 0.05$ , \*\*  $p < 0.01$ , \*\*\*  $p < 0.001$ ; Exp = experimental; Con = control; SPPB = Short Physical Performance Battery; FOG = freezing of gait; FES-I = Falls Efficacy Scale – International; PDQ-39 = Parkinson’s Disease Questionnaire – 39;

<sup>a</sup>lower score reflects better performance; <sup>b</sup>Week 26 Exp N=101, Con N=112; <sup>c</sup>Exp N=100, Con N=112;

**Table e-4:** *Post hoc disease severity subgroup analysis of secondary outcomes. P-values for the interaction between intervention and disease severity are reported.*

| <b>Secondary Outcomes</b>                            | <b>P value</b> |
|------------------------------------------------------|----------------|
| PD Fall Risk score                                   | 0.39           |
| Mean knee extensor strength of both legs (kg)        | 0.27           |
| Coordinated stability test (error score)             | 0.13           |
| SPPB continuous measure (0-3)                        | 0.88           |
| 4 m fast walk velocity (m.sec <sup>-1</sup> )        | 0.11           |
| Stand up and sit down 5 times (stand/s) <sup>c</sup> | 0.20           |
| FOG questionnaire (0-24)                             | 0.86           |
| FES-I (16-64)                                        | 0.98           |
| SF-12 physical (0-100)                               | 0.91           |
| SF-12 mental (0-100)                                 | 0.70           |
| SF-6D utility score (0-1)                            | 0.33           |
| Exercise (hr/wk)                                     | 0.04*          |
| ADL (hr/day)                                         | 0.92           |
| PDQ-39 (0-100)                                       | 0.26           |
| Positive affect scale (0-50)                         | 0.95           |

\*p < 0.05

**Table e-5. Characteristics of participants according to disease severity at baseline.**

| <b>Characteristic</b>                                | <b>Low<br/>(n=122)</b> | <b>High<br/>(n=109)</b> |
|------------------------------------------------------|------------------------|-------------------------|
| Gender, % males***                                   | 58 (48%)               | 77 (71%)                |
| Age, years                                           | 69.8 (9.4)             | 71.6 (7.9)              |
| Falls in past 12 months, median number (IQR)†*       | 2 (2)                  | 3 (3)                   |
| People who fell in the past year, number (%)         | 91 (75%)               | 89 (82%)                |
| People who fell 2+ times in past year, number (%)    | 70 (57%)               | 76 (70%)                |
| People who fell 10+ times in past year, number (%)** | 7 (6%)                 | 21 (19%)                |
| Time since PD diagnosis, years                       | 7.4 (5.2)              | 8.5 (6.5)               |
| Hoehn and Yahr stage, 0-5***                         | 2.6 (0.5)              | 2.9 (0.5)               |
| Stage 2, number %**                                  | 53 (43)                | 23 (21)                 |
| Stage 3, number %*                                   | 69 (57)                | 77 (71)                 |
| Stage 4, number %**                                  | 0 (0)                  | 9 (8)                   |
| Daily levodopa equivalent dose (mg)                  | 741 (435)              | 860 (565)               |
| Deep Brain Stimulation received, number %            | 16 (13%)               | 10 (9%)                 |
| UPDRS motor examination, 0-108***                    | 18.9 (4.7)             | 34.5 (6.0)              |
| Freezing of gait in the past month, number (%)**     | 49 (40%)               | 65 (60%)                |
| Mini-Mental State Examination, 0-30***               | 29.0 (1.2)             | 28.3 (1.6)              |
| Frontal Assessment Battery, 0-18***                  | 14.7 (2.2)             | 13.5 (2.6)              |
| Daily levodopa equivalent dose (mg)                  | 741 (435)              | 860 (565)               |
| ≥ 2 co-existing conditions, number of people (%)‡    | 58 (47%)               | 58 (53%)                |
| Prior knee replacement surgery, number of people (%) | 15 (12%)               | 17 (16%)                |
| Prior hip replacement surgery, number of people (%)  | 9 (7%)                 | 13 (12%)                |
| Prior spinal surgery, number of people (%)           | 10 (8%)                | 9 (8%)                  |

| <b>Characteristic</b>                                  | <b>Low</b>     | <b>High</b>    |
|--------------------------------------------------------|----------------|----------------|
|                                                        | <b>(n=122)</b> | <b>(n=109)</b> |
| <b>Characteristic</b>                                  | <b>Low</b>     | <b>High</b>    |
|                                                        | <b>(n=122)</b> | <b>(n=109)</b> |
| <b>Secondary outcome measures at baseline</b>          |                |                |
| PD Fall Risk score, 0-1**                              | 0.34 (0.28)    | 0.47 (0.29)    |
| Mean knee extensor strength of both legs (kg)          | 30.2 (11.0)    | 28.6 (9.3)     |
| Coordinated stability test (error score)**             | 14.3 (12.8)    | 19.8 (14.6)    |
| SPPB continuous measure, 0-3**                         | 2.46 (0.29)    | 2.30 (0.40)    |
| 4 m fast walk speed (m.s <sup>-1</sup> )**             | 1.42 (0.37)    | 1.28 (0.36)    |
| Stand up and sit down 5 times (stand/s)***             | 0.41 (0.13)    | 0.30 (0.16)    |
| FOG questionnaire, 0-24**                              | 6.6 (4.9)      | 9.0 (5.5)      |
| FES-I, 16-64**                                         | 30.0 (9.1)     | 34.3 (10.1)    |
| SF-12 physical, 0-100**                                | 44.2 (7.6)     | 40.7 (7.5)     |
| SF-12 mental, 0-100                                    | 50.9 (6.4)     | 51.2 (7.0)     |
| SF-6D utility score (0-1)*                             | 0.66 (0.10)    | 0.63 (0.08)    |
| Exercise, hr/week*                                     | 4.4 (4.3)      | 3.2 (3.0)      |
| ADL, hr/day**                                          | 2.6 (1.2)      | 2.1 (1.4)      |
| PDQ-39, 0-100**                                        | 26.3 (14.3)    | 32.8 (14.4)    |
| Positive affect scale, 0-50                            | 32.5 (5.8)     | 31.3 (6.5)     |
| <b>At risk of falls screening measures at baseline</b> |                |                |
| Functional reach***                                    | 30.3 (6.8)     | 24 (7.0)       |
| Near tandem stand (eyes closed), s**                   | 7.7 (3.3)      | 6.3 (3.7)      |
| Alternate step test (steps/s)**                        | 0.97 (0.30)    | 0.82 (0.35)    |
| Stand up and sit down 5 times (stand/s)***             | 0.41 (0.13)    | 0.30 (0.16)    |

*Data are mean (SD) unless stated otherwise.*

UPDRS: Unified Parkinson's Disease Rating Scale

†Median (IQR) scores are presented, as scores ranged from 0 to 104 in the low disease severity sub-



group and 0 to 1825 in the high disease severity sub-group.

‡Conditions included arthritis, heart disease, high blood pressure, lung disease, diabetes, osteoporosis, depression, chronic back pain and cancer; the number of coexisting conditions ranged from 0 to 9.

\* $p < 0.05$ , \*\* $p < 0.01$ , \*\*\* $p < 0.001$  (two-tailed t-test for interval data, Chi-square test for categorical data, †Mann Whitney U test)
